# Supplementary material
Source: PubMed Central journal article supplement (PMC5477214)
Supplement: CJN.09410916SupplementaryData.pdf [file CJN.09410916SupplementaryData.pdf]

*Supplemental material is neither peer-reviewed nor thoroughly edited by CJASN. The authors alone are responsible for the accuracy and presentation of the material.*

## Supplemental Material

### Appendix A. Classification of reason for admission

| <b>Chapter Number</b> | <b>ICD-10-CA Chapter Title</b>                                                                      | <b>Code Range</b> |
|-----------------------|-----------------------------------------------------------------------------------------------------|-------------------|
| I                     | Certain infectious and parasitic diseases                                                           | A00–B99           |
| II                    | Neoplasms                                                                                           | C00–D48           |
| III                   | Diseases of the blood and blood-forming organs and certain disorders involving the immune mechanism | D50–D89           |
| IV                    | Endocrine, nutritional and metabolic diseases                                                       | E00–E90           |
| V                     | Mental and behavioural disorders                                                                    | F00–F99           |
| VI                    | Diseases of the nervous system                                                                      | G00–G99           |
| VII                   | Diseases of the eye and adnexa                                                                      | H00–H59           |
| VIII                  | Diseases of the ear and mastoid process                                                             | H60–H95           |
| IX                    | Diseases of the circulatory system                                                                  | I00–I99           |
| X                     | Diseases of the respiratory system                                                                  | J00–J99           |
| XI                    | Diseases of the digestive system                                                                    | K00–K93           |
| XII                   | Diseases of the skin and subcutaneous tissue                                                        | L00–L99           |
| XIII                  | Diseases of the musculoskeletal system and connective tissue                                        | M00–M99           |
| XIV                   | Diseases of the genitourinary system                                                                | N00–N99           |
| XV                    | Pregnancy, childbirth and the puerperium                                                            | O00–O99           |
| XVI                   | Certain conditions originating in the perinatal period                                              | P00–P96           |
| XVII                  | Congenital malformations, deformations, and chromosomal abnormalities                               | Q00–Q99           |
| XVIII                 | Symptoms, signs and abnormal clinical and laboratory findings not elsewhere classified              | R00–R99           |
| XIX                   | Injury, poisoning and certain other consequences of external causes                                 | S00–T98           |
| XX                    | External causes of morbidity and mortality                                                          | V01–Y98           |
| XXI                   | Factors influencing health status and contact with health services                                  | Z01–Z99           |
| XXII                  | Morphology of Neoplasms                                                                             | 8000/0-9989/1     |
| XXIII                 | Provisional codes for research and temporary assignment                                             | U00–U99           |

Supplemental material is neither peer-reviewed nor thoroughly edited by CJASN. The authors alone are responsible for the accuracy and presentation of the material.

### Appendix B. Example for HAC group and subgroup classification using ICD 10 codes

| Group                | Subgroups                                                                                                 | ICD 10 CA Codes                                                                                                                                                                                                                                                                                                                                                                                                                                                                                                                                                                                                                                                                                                                                                                                                                                                                                                                                                                                                                                                                                                                                                                                                                                                                                                                                                                   |
|----------------------|-----------------------------------------------------------------------------------------------------------|-----------------------------------------------------------------------------------------------------------------------------------------------------------------------------------------------------------------------------------------------------------------------------------------------------------------------------------------------------------------------------------------------------------------------------------------------------------------------------------------------------------------------------------------------------------------------------------------------------------------------------------------------------------------------------------------------------------------------------------------------------------------------------------------------------------------------------------------------------------------------------------------------------------------------------------------------------------------------------------------------------------------------------------------------------------------------------------------------------------------------------------------------------------------------------------------------------------------------------------------------------------------------------------------------------------------------------------------------------------------------------------|
| <b>A: Infections</b> | <b>A_2: Central nervous system(meningitis, brain abscess, encephalitis .....), intracranial phlebitis</b> | <p><b>G002:</b> Streptococcal meningitis Includes: Non-pneumococcal, streptococci (Streptococcus, Group A) (Streptococcus, Group B)</p> <p><b>G008:</b> Other bacterial meningitis Includes: Meningitis due to: Escherichia coli, Friedlander bacillus, Klebsiella</p> <p><b>G009:</b> Bacterial meningitis, unspecified Includes: Meningitis: purulent NOS, pyogenic NOS. suppurative NOS</p> <p><b>G030:</b> Non-pyogenic meningitis Includes: Nonbacterial meningitis</p> <p><b>G039:</b> Meningitis, unspecified Includes: Arachnoiditis (spinal) NOS</p> <p><b>G048:</b> Other encephalitis, myelitis and encephalomyelitis Includes: Post-infectious encephalitis and encephalomyelitis NOS</p> <p><b>G049:</b> myelitis and encephalomyelitis, unspecified Includes: Ventriculitis (cerebral) NOS</p> <p><b>G060:</b> Intracranial abscess and granuloma Includes: Abscess (embolic)(of): brain [any part], cerebellar, cerebral, otogenic, Intracranial abscess or granuloma: epidural, extradural, subdural</p> <p><b>G061:</b> Intra-spinal abscess and granuloma Includes: Abscess (embolic) of spinal cord [any part]Intra-spinal abscess or granuloma: epidural, extradural subdural</p> <p><b>G062:</b> Extradural and subdural abscess, unspecified</p> <p>D432: G08 C760 A858 D352 A178 D320 A879 G062 B004 C700 G008 G040 C793 G060 G061 G003 G049 A170 G042</p> |

*Supplemental material is neither peer-reviewed nor thoroughly edited by CJASN. The authors alone are responsible for the accuracy and presentation of the material.*

## **Appendix C**

### **PPC Description**

- 01 Stroke & Intracranial Hemorrhage
- 02 Extreme CNS Complications
- 03 Acute Pulmonary Edema and Respiratory Failure without Ventilation
- 04 Acute Pulmonary Edema and Respiratory Failure with Ventilation
- 05 Pneumonia & Other Lung Infections
- 06 Aspiration Pneumonia
- 07 Pulmonary Embolism
- 08 Other Pulmonary Complications
- 09 Shock
- 10 Congestive Heart Failure
- 11 Acute Myocardial Infarction
- 12 Cardiac Arrhythmias & Conduction Disturbances
- 13 Other Cardiac Complications
- 14 Ventricular Fibrillation/Cardiac Arrest
- 15 Peripheral Vascular Complications Except Venous Thrombosis
- 16 Venous Thrombosis
- 17 Major Gastrointestinal Complications without Transfusion or Significant Bleeding
- 18 Major Gastrointestinal Complications with Transfusion or Significant Bleeding
- 19 Major Liver Complications
- 20 Other Gastrointestinal Complications without Transfusion or Significant Bleeding
- 21 Clostridium Difficile Colitis
- 22 Urinary Tract Infection
- 23 GU Complications Except UTI
- 24 Renal Failure without Dialysis
- 25 Renal Failure with Dialysis
- 26 Diabetic Ketoacidosis & Coma
- 27 Post-Hemorrhagic & Other Acute Anemia with Transfusion
- 28 In-Hospital Trauma and Fractures
- 29 Poisonings Except from Anesthesia
- 30 Poisonings due to Anesthesia
- 31 Decubitus Ulcer
- 32 Transfusion Incompatibility Reaction
- 33 Cellulitis
- 34 Moderate Infections
- 35 Septicemia & Severe Infections
- 36 Acute Mental Health Changes
- 37 Post-Operative Infection & Deep Wound Disruption without Procedure
- 38 Post-Operative Wound Infection & Deep Wound Disruption with Procedure
- 39 Reopening Surgical Site
  
- 40 Post-Operative Hemorrhage & Hematoma without Hemorrhage Control Procedure or I&D Procedure
- 41 Post-Operative Hemorrhage & Hematoma with Hemorrhage Control Procedure or I&D Procedure
- 42 Accidental Puncture/Laceration During Invasive Procedure

*Supplemental material is neither peer-reviewed nor thoroughly edited by CJASN. The authors alone are responsible for the accuracy and presentation of the material.*

- 43 Accidental Cut or Hemorrhage During Other Medical Care
- 44 Other Surgical Complication - Moderate
- 45 Post-procedure Foreign Bodies
- 46 Post-Operative Substance Reaction & Non-O.R. Procedure for Foreign Body
- 47 Encephalopathy
- 48 Other Complications of Medical Care
- 49 Iatrogenic Pneumothrax
- 50 Mechanical Complication of Device, Implant & Graft
- 51 Gastrointestinal Ostomy Complications
- 52 Inflammation & Other Complications of Devices, Implants or Grafts Except Vascular Infection
- 53 Infection, Inflammation and Clotting Complications of Peripheral Vascular Catheters and Infusions
- 54 Infections due to Central Venous Catheters
- 55 Obstetrical Hemorrhage without Transfusion
- 56 Obstetrical Hemorrhage with Transfusion
- 57 Obstetric Lacerations & Other Trauma without Instrumentation
- 58 Obstetric Lacerations & Other Trauma with Instrumentation
- 59 Medical & Anesthesia Obstetric Complications
- 60 Major Puerperal Infection and Other Major Obstetric Complications
- 61 Other Complications of Obstetrical Surgical & Perineal Wounds
- 62 Delivery with Placental Complications
- 63 Post-Operative Respiratory Failure with Tracheostomy
- 64 Other In-Hospital Adverse Events

Supplemental material is neither peer-reviewed nor thoroughly edited by CJASN. The authors alone are responsible for the accuracy and presentation of the material.

#### Appendix D. Potentially preventable HAC in patients with CKD

| Complications                                | Description                                                                      | N of cases | %     |
|----------------------------------------------|----------------------------------------------------------------------------------|------------|-------|
| <b>A: Infections</b>                         | A_3: Respiratory (pneumonia, mediastinitis, pulmonary abscess ...)               | 455        | 4     |
|                                              | A_5: Genitourinary infection (UTI, cystitis, pyelonephritis ...)                 | 481        | 4     |
| <b>B: Electrolyte imbalance</b>              | B_3: Acid-base, fluid, and electrolyte balance, metabolic disorders              | 493        | 4     |
| <b>D: Cardiovascular complications</b>       | D_4: Acute myocardial infarction                                                 | 449        | 4     |
|                                              | D_16: Post procedural complications                                              | 542        | 4     |
| <b>E: Respiratory complications</b>          | E_6: Post procedural disorders (Pneumothorax included)                           | 528        | 4     |
| <b>M: Hematologic complications</b>          | M_4: Anemia due to bleeding                                                      | 494        | 4     |
| <b>P: Surgical medical complications</b>     | P_2: Other complications of surgical and medical care , not elsewhere classified | 439        | 4     |
| <b>Others</b>                                |                                                                                  | 3939       | 50    |
| <b>Potentially preventable complications</b> |                                                                                  | 7820       | 63.11 |
| <b>Total recorded complications (HACs)</b>   |                                                                                  | 12126      | 100   |

Supplemental material is neither peer-reviewed nor thoroughly edited by CJASN. The authors alone are responsible for the accuracy and presentation of the material.

## Appendix E. Association of outcomes in patients with CKD with all HACs

|                                     | Index hospitalization<br>Mortality <sup>A</sup> (95% CI) | Discharge to 90-day<br>Mortality <sup>A</sup><br>(95% CI) | Incremental LOS(days) <sup>B</sup><br>(median)<br>(95% CI) | 90-days<br>re-admission <sup>A</sup><br>(95% CI) |
|-------------------------------------|----------------------------------------------------------|-----------------------------------------------------------|------------------------------------------------------------|--------------------------------------------------|
| ≥ 1 Potentially<br>preventable HACs | 5.28(4.79 – 5.82)                                        | 1.37 (1.22 – 1.53)                                        | 14.32 (13.81 – 14.83)                                      | 1.27 (1.19 – 1.35)                               |
| One                                 | 3.55 (3.13 – 4.03)                                       | 1.40 (1.21 – 1.61)                                        | 9.31 (8.67 – 9.96)                                         | 1.21 (1.11 – 1.31)                               |
| 2-3                                 | 6.26 (5.42 – 7.24)                                       | 1.34 (1.11 – 1.62)                                        | 16.12 (15.24 – 17.00)                                      | 1.34 (1.21 – 1.49)                               |
| 4-5                                 | 14.86 (11.85 –<br>18.64)                                 | 1.04 (0.71 – 1.53) *                                      | 24.05 (22.39 – 25.71)                                      | 1.37 (1.12 – 1.67)                               |
| >5                                  | 17.40 (13.15 – 23.03)                                    | 1.71 (1.15 – 2.53)                                        | 42.91 (40.88 – 44.94)                                      | 1.50 (1.18 – 1.90)                               |

A. Fully adjusted for age, admission type (elective vs urgent), gender, LOS, severity of CKD, non-preventable complications, and 16 comorbid conditions.

B. Fully adjusted for age, admission type (elective vs urgent), gender, severity of CKD, non-preventable complications, and 16 comorbid condition.

- Reference; admissions without HAC

\*Non-significant

Supplemental material is neither peer-reviewed nor thoroughly edited by CJASN. The authors alone are responsible for the accuracy and presentation of the material.

## Appendix F. Association of outcomes in patients with CKD with potentially preventable HACs by severity of CKD

| CKD Severity | Mortality: Index hospitalization <sup>A</sup><br>(95% CI) | Mortality: Discharge to 90-days <sup>A</sup><br>(95% CI) | Length of stay <sup>B</sup><br>(mean) (95% CI) | Re-Admission Discharge to 90-days <sup>A</sup><br>(95% CI) |
|--------------|-----------------------------------------------------------|----------------------------------------------------------|------------------------------------------------|------------------------------------------------------------|
| Moderate     | 4.81 (4.09 – 5.67)                                        | 1.06 (0.81 – 1.31) *                                     | 9.86 (8.91 – 10.32)                            | 1.32 (1.20 – 1.43)                                         |
| High         | 4.51 (3.71 – 5.46)                                        | 1.32 (1.04 – 1.69)                                       | 10.24 (8.87 – 11.61)                           | 1.15 (1.00 – 1.32)                                         |
| Very high    | 4.81 (3.76 – 6.13)                                        | 0.84 (0.61 – 1.15) *                                     | 10.23 (8.54 – 11.91)                           | 1.12 (0.94 – 1.35) *                                       |

A. Fully adjusted for age, admission type (elective vs urgent), gender, LOS, severity of CKD, non-preventable complications, and 17 comorbid conditions

B. Fully adjusted for age, admission type (elective vs urgent), gender, severity of CKD, non-preventable complications, and 17 comorbid condition; Comorbid conditions: cancer, cerebrovascular disease, congestive heart failure, COPD, dementia, diabetes with complications, diabetes with NO complications, HIV/AIDS, metastatic solid tumor, myocardial infarction, mild liver disease, moderate/severe liver disease, para/hemiplegia, peptic ulcer disease, peripheral vascular diseases, rheumatologic diseases

- Reference; admissions without HAC

\*Non-significant
